# Supplementary material for: Establishment of the Embryonic Shoot Meristem Involves Activation of Two Classes of Genes with Opposing Functions for Meristem Activities
Source: Int J Mol Sci. 2020 Aug 15;21(16):5864. doi: 10.3390/ijms21165864 (PMC7461597; doi:10.3390/ijms21165864)
Supplement: Supplementary file 1 [file ijms-21-05864-s001.zip › Supplementary_Tables.xlsx]

## Sheet: Table S1
Table S1. List of 52 Genes Downregulated in cuc1 cuc2 Embryos in Microarray Experiments.
GeneName	Description	Experiment 1 (cuc1 cuc2 Cy5 (red) / Ler Cy3 (green))						Experiment 2 (cuc1 cuc2 Cy3 (green) / Ler Cy5 (red))
		Log Ratio	Fold Change	PValueLogRatio*	gProcessedSignal	rProcessedSignal		Log Ratio	Fold Change	PValueLogRatio*	gProcessedSignal	rProcessedSignal
AT1G08830.1	copper/zinc superoxidase dismutase (CSD1)	-0.160676	0.690754	0.00157293	9691.59	6694.51		-0.141439	0.72204	0.0049428	7794.76	10795.5
AT1G10580.1	putative pre-mRNA splicing factor	-0.167483	0.680012	0.00357723	2024.33	1376.57		-0.237397	0.578899	1.31922e-05	1453.3	2510.45
AT1G13710.1	cytochrome p450 family	-1.03978	0.0912473	3.19611e-28	5613.41	512.209		-1.12868	0.0743567	3.43735e-30	448.753	6035.14
AT1G16030.1	heat shock protein hsp70, putative	-0.232178	0.585897	5.47524e-05	2391.24	1401.02		-0.24697	0.566278	6.5941e-06	1409.05	2488.26
AT1G24793.1	F5A9.18	-0.185066	0.653032	0.000298592	12143.7	7930.19		-0.158747	0.69383	0.00168164	11486.9	16555.8
AT1G24880.1	F5A9.14	-0.18939	0.646562	0.000214118	16510	10674.7		-0.158914	0.693564	0.00166055	12749.5	18382.6
AT1G25054.1	F5A9.8	-0.179098	0.662066	0.000440425	16691.9	11051.2		-0.161161	0.689984	0.00143869	11883.1	17222.3
AT1G26800.1	expressed protein	-0.172594	0.672057	0.00624855	1475.44	991.582		-0.188988	0.64716	0.00144703	811.775	1254.37
AT1G30950.1	unusual floral organ (UFO), AtFBX1	-0.326366	0.471665	2.54991e-05	1182.93	557.945		-0.397701	0.400221	3.97166e-09	521.225	1302.34
AT1G62360.1	homeobox protein, putative	-0.656464	0.220565	3.09773e-08	919.489	202.807		-0.598298	0.252175	2.41544e-11	236.033	935.988
AT1G68640.1	bZIP transcription factor, PERIANTHIA	-0.212407	0.613187	5.02963e-05	6114.22	3749.16		-0.14936	0.70899	0.00324927	3973.79	5604.86
AT2G01520.1	major latex protein (MLP)-related	-0.206893	0.621022	0.00015827	3045.03	1891.03		-0.273345	0.532912	4.7708e-07	1918.78	3600.56
AT2G06390.1	5S ribosomal RNA	-0.211919	0.613876	0.00131556	1402.74	861.106		-0.388196	0.409076	7.98271e-11	1030.34	2518.71
AT2G11520.1	putative protein kinase	-0.196042	0.636734	0.00136385	1691.55	1077.07		-0.197058	0.635246	0.000357683	1178.29	1854.85
AT2G20560.1	putative heat shock protein	-0.15554	0.698972	0.00209223	15633.8	10927.6		-0.144696	0.716645	0.0040275	11329.8	15809.6
AT2G21060.1	glycine-rich protein (AtGRP2)	-0.294409	0.507681	0.000316258	1020.96	518.325		-0.176309	0.666333	0.00736508	596.746	895.567
AT2G32120.1	70kD heat shock protein	-0.13349	0.735378	0.00779399	19471.9	14319.2		-0.134459	0.733738	0.00733231	13369	18220.4
AT2G33210.1	mitochondrial chaperonin (HSP60)	-0.227775	0.591868	2.4385e-05	3952.26	2339.22		-0.3112	0.488428	1.3802e-08	2466.26	5049.39
AT2G36830.1	putative aquaporin (tonoplast intrinsic protein gamma)	-0.192714	0.641631	0.000917959	2043.37	1311.09		-0.239664	0.575886	1.84709e-05	1138.53	1977
AT2G46060.1	hypothetical protein	-0.186926	0.65024	0.00645643	1225.27	796.721		-0.335115	0.462258	3.85115e-07	557.317	1205.64
AT2G47180.1	putative galactinol synthase	-0.23511	0.581956	2.35331e-05	3030.9	1763.85		-0.244854	0.569044	5.81702e-06	1694.45	2977.71
AT3G02040.1	expressed protein	-0.332707	0.464828	2.07299e-07	1976.07	918.531		-0.351959	0.444673	3.90819e-09	898.566	2020.73
AT3G08770.1	putative nonspecific lipid-transfer protein	-0.156912	0.696768	0.00603202	2031.37	1415.39		-0.172147	0.672748	0.00196051	1100.91	1636.43
AT3G08900.1	putative reversibly glycosylatable polypeptide	-0.274044	0.532054	0.000287929	1145.86	609.66		-0.220361	0.602059	0.000605663	619.178	1028.43
AT3G08970.1	putative DnaJ protein	-0.16041	0.691178	0.00195281	4786.67	3308.45		-0.14493	0.716258	0.00448536	3003.87	4193.84
AT3G11820.1	syntaxin SYP121	-0.252063	0.559677	0.00106554	1069.17	598.391		-0.154936	0.699946	0.0092974	807.432	1153.56
AT3G13470.1	chaperonin 60 beta, putative	-0.134334	0.733949	0.00742071	20245.3	14859		-0.130968	0.73966	0.00892978	15093.1	20405.5
AT3G13860.1	chaperonin, putative	-0.152043	0.704623	0.00350136	4111.7	2897.2		-0.143285	0.718978	0.00497654	2924.03	4066.92
AT3G43160.1	putative protein	-0.244416	0.569619	8.86514e-05	1759.95	1002.5		-0.161561	0.689348	0.00439215	986.464	1431.01
AT3G53230.1	CDC48 - like protein	-0.249279	0.563276	0.00792562	771.578	434.611		-0.27493	0.53097	0.000610447	366.7	690.623
AT3G63350.1	heat shock transcription factor-like protein	-0.234497	0.582777	0.00556693	887.46	517.192		-0.211708	0.614174	0.00381742	459.427	748.041
AT4G04610.1	5-adenylylsulfate reductase	-0.260297	0.549166	0.000469984	1156.61	635.168		-0.239677	0.575868	8.02667e-05	739.571	1284.27
AT4G12400.1	stress-induced protein sti1 -like protein	-0.151786	0.705041	0.00261339	22453	15830.3		-0.168958	0.677708	0.000859145	14530.3	21440.3
AT4G21990.1	PRH26 protein	-0.256469	0.554027	0.00161356	976.082	540.776		-0.254518	0.556522	8.33025e-05	599.915	1077.97
AT4G25200.1	Arabidopsis mitochondrion-localized small heat shock protein (AtHSP23.6-mito)	-0.168837	0.677897	0.00090303	12027.2	8153.2		-0.147098	0.712693	0.00351515	8069.94	11323.2
AT4G27670.1	heat shock protein 21	-0.190835	0.644414	0.00552203	1227.05	790.725		-0.242059	0.572718	4.54981e-05	814.77	1422.64
AT4G29030.1	glycine-rich protein like	-0.446972	0.357296	2.94095e-13	4528.84	1618.13		-0.429466	0.371993	4.15723e-13	1789.48	4810.53
AT4G30250.1	putative protein	-0.211976	0.613795	9.44599e-05	3375.4	2071.8		-0.204146	0.624963	0.000111951	1932.6	3092.34
AT5G03210.1	putative protein	-0.140641	0.723367	0.00625592	4763.5	3445.76		-0.1616	0.689287	0.00162621	2909.94	4221.67
AT5G03340.1	putative protein	-0.18578	0.651959	0.000612903	3038.53	1981		-0.187279	0.649712	0.000323687	2332.95	3590.75
AT5G03350.1	putative protein	-0.274355	0.531673	3.95237e-07	5892.34	3132.8		-0.28911	0.513914	8.65367e-08	2918.61	5679.19
AT5G10695.1	Expressed protein	-0.194275	0.639329	0.000237799	4243.89	2713.25		-0.232015	0.586118	1.06277e-05	2718.56	4638.26
AT5G11930.1	glutaredoxin - like protein	-0.32817	0.46971	3.13074e-07	1943.69	912.972		-0.372436	0.424194	4.30261e-10	972.098	2291.64
AT5G20150.1	ids4-like protein	-0.290222	0.512599	7.6641e-07	2601.38	1333.46		-0.270427	0.536504	8.68842e-07	1508.1	2810.97
AT5G24660.1	putative protein	-0.201273	0.629111	0.00750639	1036.85	652.292		-0.283348	0.520778	3.40635e-06	736.631	1414.48
AT5G25450.1	ubiquinol--cytochrome-c reductase-like protein	-0.251382	0.560555	5.83699e-05	1768.98	991.61		-0.213733	0.611317	0.000232065	892.438	1459.86
AT5G45020.1	putative protein	-0.204872	0.623918	0.000177285	3078.44	1920.69		-0.366707	0.429826	1.82065e-10	1495.05	3478.26
AT5G47590.1	putative protein	-0.289535	0.51341	0.00174954	830.213	426.24		-0.276471	0.529089	0.000139681	445.1	841.259
AT5G51570.1	putative protein	-0.274365	0.531661	0.000130538	1278.79	679.883		-0.275388	0.530411	9.83607e-06	676.923	1276.22
AT5G55410.1	unknown protein	-0.176106	0.666645	0.00263432	1909.11	1272.69		-0.204022	0.625141	0.000197493	1257.39	2011.38
AT5G57290.1	60S acidic ribosomal protein P3	-0.180309	0.660223	0.000501794	5673.99	3746.1		-0.295967	0.505863	3.97379e-08	4725.39	9341.24
AT5G57350.1	plasma membrane ATPase 3 (proton pump) (sp|P20431)	-0.304492	0.49603	0.00843777	622.249	308.654		-0.365591	0.430932	0.000264713	235.938	547.506
*P-value of the log ratio as determined by Agilent error model (Zahurak et al., 2007). http://www.ncbi.nlm.nih.gov/pubmed/17472750

## Sheet: Table S2
Table S2. Quantitative RT-PCR of 51 Selected Genes in Heart Stage Embryos.
Gene Name	Description	Experiment 1				Experiment 2
		Ler*	cuc1 cuc2*	Ratio (cuc1 cuc2/Ler)		Ler*	cuc1 cuc2*	Ratio (cuc1 cuc2/Ler)
AT1G08830	copper/zinc superoxidase dismutase (CSD1)	38.4547	60.0529	1.56166		119.948	150.045	1.25092
AT1G10580	putative pre-mRNA splicing factor	209.721	191.696	0.914054		815.415	379.334	0.465203
AT1G13710	cytochrome p450 family	188.02	62.9625	0.334871		279.337	145.681	0.521523
AT1G16030	heat shock protein hsp70, putative	438.935	188.524	0.429502		35.9636	94.3265	2.62283
AT1G24793	F5A9.18	5.2494	1.8446	0.351393		0.534281	2.93505	5.49347
AT1G24880	F5A9.14	n.t.	n.t.	n.t.		n.t.	n.t.	n.t.
AT1G25054	F5A9.8	n.t.	n.t.	n.t.		n.t.	n.t.	n.t.
AT1G26800	expressed protein	396.175	62.5504	0.157886		66.0953	304.105	4.601
AT1G30950	unusual floral organ (UFO), AtFBX1	73.3444	10.8334	0.147706		123.419	13.3895	0.108488
AT1G62360	homeobox protein, putative (STM)	0.007571	0.000761662	0.100603		0.00247148	4.25018e-05	0.0171969
AT1G68640	bZIP transcription factor, PERIANTHIA	856.959	424.873	0.495792		2192.46	517.252	0.235923
AT2G01520	major latex protein (MLP)-related	10.787	7.74354	0.717857		1.53515	4.5571	2.9685
AT2G06390	5S ribosomal RNA	n.t.	n.t.	n.t.		n.t.	n.t.	n.t.
AT2G11520	putative protein kinase	16.2585	10.1333	0.62326		0.56153	0.482035	0.858431
AT2G20560	putative heat shock protein	4567.18	2232.96	0.488914		599.191	676.175	1.12848
AT2G21060	glycine-rich protein (AtGRP2)	109.651	65.8207	0.600275		38.9606	22.3052	0.572507
AT2G32120	70kD heat shock protein	502.083	224.659	0.447454		166.234	942.368	5.66893
AT2G33210	mitochondrial chaperonin (HSP60)	30.1451	76.6114	2.54142		2822.99	222.526	0.0788263
AT2G36830	putative aquaporin (tonoplast intrinsic protein gamma)	31.936	14.7124	0.460684		0.905778	7.25596	8.01076
AT2G46060	hypothetical protein	11.0594	13.0518	1.18015		1.99541	0.438163	0.219585
AT2G47180	putative galactinol synthase	4648.16	1440.4	0.309885		171.702	479.403	2.79207
AT3G02040	expressed protein	442.142	478.883	1.0831		165.933	133.587	0.805066
AT3G08770	putative nonspecific lipid-transfer protein	424.563	457.231	1.07695		392.717	272.599	0.694136
AT3G08900	putative reversibly glycosylatable polypeptide	73.2604	71.015	0.969351		8.77486	23.0369	2.62533
AT3G08970	putative DnaJ protein	52.9077	38.0379	0.718949		25.7642	96.0828	3.72931
AT3G11820	syntaxin SYP121	95.567	72.3751	0.757323		6.79383	1.20613	0.177533
AT3G13470	chaperonin 60 beta, putative	165.127	15.9237	0.0964329		17.8234	94.2887	5.29017
AT3G13860	chaperonin, putative	602.891	891.386	1.47852		267.633	161.852	0.604754
AT3G43160	putative protein	1.99208	1.47404	0.739946		543.844	169.846	0.312307
AT3G53230	CDC48 - like protein	58.5995	40.2132	0.686239		18.906	52.4755	2.77561
AT3G63350	heat shock transcription factor-like protein	455.256	122.829	0.269801		48.3525	191.774	3.96615
AT4G04610	5-adenylylsulfate reductase	93.8124	160.768	1.71371		98.7044	81.9623	0.830381
AT4G12400	stress-induced protein sti1 -like protein	2611.39	2120.6	0.812056		1370.87	698.272	0.509364
AT4G21990	PRH26 protein	86.3035	173.252	2.00747		6.90452	4.79955	0.695131
AT4G25200	Arabidopsis mitochondrion-localized small heat shock protein (AtHSP23.6-mito)	7112.65	3914.46	0.550352		1301.17	4360.65	3.35134
AT4G27670	heat shock protein 21	70.2138	20.2964	0.289066		0.960986	15.556	16.1875
AT4G29030	glycine-rich protein like	1120.67	813.252	0.725682		4210.47	6441	1.52976
AT4G30250	putative protein	65.2749	90.2528	1.38266		138.706	191.755	1.38245
AT5G03210	putative protein	3621.6	2296.63	0.634148		861.299	4264.28	4.95099
AT5G03340	putative protein	32.2517	15.3166	0.474908		6.30886	24.5826	3.89653
AT5G03350	putative protein	202.613	48.3473	0.238619		371.123	64.7731	0.174533
AT5G10695	Expressed protein	2878.92	725.408	0.251972		293.015	939.72	3.20707
AT5G11930	glutaredoxin - like protein	524.479	179.926	0.343056		878.88	184.68	0.210132
AT5G20150	ids4-like protein	428.25	594.295	1.38773		212.888	106.433	0.499949
AT5G24660	putative protein	1333.15	612.52	0.459454		129.318	561.401	4.34123
AT5G25450	ubiquinol--cytochrome-c reductase-like protein	288.126	133.043	0.461752		70.0067	295.489	4.22086
AT5G45020	putative protein	216.792	223.709	1.03191		205.955	304.013	1.47611
AT5G47590	putative protein	39.6373	12.5069	0.315534		16.5484	29.1509	1.76155
AT5G51570	putative protein	211.87	149.671	0.706427		298.032	249.637	0.837616
AT5G55410	unknown protein	11.2129	9.70682	0.865683		0.174184	3.8485	22.0944
AT5G57290	60S acidic ribosomal protein P3	12858.6	11576.9	0.900317		13669.9	17788.3	1.30127
AT5G57350	plasma membrane ATPase 3 (proton pump) (sp|P20431)	22.1282	24.0607	1.08733		79.5833	85.2743	1.07151
*Expression levels relative to ACT8; n.t. not tested (suitable primers could not be designed).
Genes downregulated in cuc1 cuc2 (< 0.5 fold) in both experiments are shown in bold.

## Sheet: Table S3
Table S3. Quantitative RT-PCR of 51 Selected Genes in Bending Cotyledon Stage Embryos.
Gene Name	Description	Experiment 1				Experiment 2
		Ler*	cuc1 cuc2*	Ratio (cuc1 cuc2/Ler)		Ler*	cuc1 cuc2*	Ratio (cuc1 cuc2/Ler)
AT1G08830	copper/zinc superoxidase dismutase (CSD1)	42.8899	28.7191	0.669601		31.7504	30.8483	0.971589
AT1G10580	putative pre-mRNA splicing factor	407.885	593.75	1.45568		611.152	557.177	0.911683
AT1G13710	cytochrome p450 family	8.25137	1.2724	0.154205		158.009	1.4907	0.00943427
AT1G16030	heat shock protein hsp70, putative	578.435	5461.74	9.44228		171.448	129.705	0.756529
AT1G24793	F5A9.18	1.02957	13.2907	12.909		2.04258	0.331603	0.162345
AT1G24880	F5A9.14	n.t.	n.t.	n.t.		n.t.	n.t.	n.t.
AT1G25054	F5A9.8	n.t.	n.t.	n.t.		n.t.	n.t.	n.t.
AT1G26800	expressed protein	63.9121	47.107	0.73706		8.4086	75.7437	9.00788
AT1G30950	unusual floral organ (UFO), AtFBX1	338.988	704.698	2.07883		12.1783	1.20295	0.0987781
AT1G62360	homeobox protein, putative (STM)	0.000481268	1.01919e-05	0.0211771		0.00186528	2.09754e-05	0.0112452
AT1G68640	bZIP transcription factor, PERIANTHIA	50.4181	139.122	2.75937		62.8532	56.174	0.893734
AT2G01520	major latex protein (MLP)-related	3.65336	25.0089	6.84546		4.74866	2.3288	0.490412
AT2G06390	5S ribosomal RNA	n.t.	n.t.	n.t.		n.t.	n.t.	n.t.
AT2G11520	putative protein kinase	4.05415	20.5537	5.0698		4.29928	2.06854	0.481135
AT2G20560	putative heat shock protein	32.0779	37.0852	1.1561		195.11	328.365	1.68297
AT2G21060	glycine-rich protein (AtGRP2)	419.654	452.868	1.07915		27.8787	26.0062	0.932836
AT2G32120	70kD heat shock protein	67.2948	19.5934	0.291158		28.0208	75.1321	2.6813
AT2G33210	mitochondrial chaperonin (HSP60)	25.0797	310.433	12.3778		51.3748	76.1994	1.48321
AT2G36830	putative aquaporin (tonoplast intrinsic protein gamma)	1.67444	4.23413	2.52868		4.05599	6.64673	1.63874
AT2G46060	hypothetical protein	7.95575	21.4402	2.69493		1.22666	0.735826	0.599862
AT2G47180	putative galactinol synthase	12009.9	2936.49	0.244505		56.6267	82.2864	1.45314
AT3G02040	expressed protein	272.847	310.81	1.13914		104.023	76.6968	0.737306
AT3G08770	putative nonspecific lipid-transfer protein	13.7156	20.6203	1.50342		106.566	16.3735	0.153647
AT3G08900	putative reversibly glycosylatable polypeptide	38.1443	122.269	3.20544		6.49461	16.3694	2.52047
AT3G08970	putative DnaJ protein	10.7041	23.454	2.19111		14.0583	25.4089	1.80739
AT3G11820	syntaxin SYP121	33.8796	35.1569	1.0377		41.6493	34.9626	0.839452
AT3G13470	chaperonin 60 beta, putative	4.57674	5.04968	1.10334		16.2953	38.2267	2.34587
AT3G13860	chaperonin, putative	47.9479	169.679	3.53883		250.082	216.141	0.864281
AT3G43160	putative protein	0.28083	3.85391	13.7233		0.860125	0.093218	0.108377
AT3G53230	CDC48 - like protein	121.851	43.4683	0.356733		252.827	43.9437	0.173809
AT3G63350	heat shock transcription factor-like protein	113.531	201.325	1.7733		38.3166	227.742	5.94371
AT4G04610	5-adenylylsulfate reductase	1665.03	591.673	0.355352		445.649	95.5814	0.214477
AT4G12400	stress-induced protein sti1 -like protein	51.5854	57.8552	1.12154		131.456	397.998	3.02762
AT4G21990	PRH26 protein	2661.7	127.771	0.0480034		365.534	40.1827	0.109929
AT4G25200	Arabidopsis mitochondrion-localized small heat shock protein (AtHSP23.6-mito)	0.490388	6.72967	13.7232		16.7319	654.564	39.1207
AT4G27670	heat shock protein 21	12.1429	43.1668	3.55491		3.18981	6.96923	2.18484
AT4G29030	glycine-rich protein like	30.8333	572.874	18.5797		47.1329	23.9712	0.508587
AT4G30250	putative protein	21.0703	17.6115	0.835844		15.3546	5.11923	0.333399
AT5G03210	putative protein	395.622	143.813	0.363511		816.556	365.883	0.448081
AT5G03340	putative protein	19.2517	186.054	9.66427		2.88304	2.77981	0.964193
AT5G03350	putative protein	29.1304	300.39	10.3119		53.7328	93.1863	1.73425
AT5G10695	Expressed protein	534.415	122.588	0.229387		167.947	189.989	1.13124
AT5G11930	glutaredoxin - like protein	8.0085	7.50574	0.937222		247.1	93.8321	0.379733
AT5G20150	ids4-like protein	126.751	208.067	1.64154		316.189	149.771	0.473676
AT5G24660	putative protein	21.7409	14.9593	0.688073		288.145	30.3725	0.105407
AT5G25450	ubiquinol--cytochrome-c reductase-like protein	8.647	23.811	2.75367		20.0574	65.4046	3.26088
AT5G45020	putative protein	367.746	1096.54	2.9818		329.592	418.589	1.27002
AT5G47590	putative protein	8.49952	91.8902	10.8112		7.60471	2.07924	0.273415
AT5G51570	putative protein	1124.67	515.28	0.458162		928.552	486.794	0.52425
AT5G55410	unknown protein	6.7756	82.6087	12.1921		3.42185	3.0428	0.889226
AT5G57290	60S acidic ribosomal protein P3	467.517	770.594	1.64827		19827.3	11338.3	0.571854
AT5G57350	plasma membrane ATPase 3 (proton pump) (sp|P20431)	17.3178	10.4199	0.601684		121.301	9.58917	0.0790526
*Expression levels relative to ACT8; n.t. not tested (suitable primers could not be designed).
Genes downregulated in cuc1 cuc2 (< 0.5 fold) in both experiments are shown in bold.

## Sheet: Table S4
Table S4. Mutants used in this analysis.
AGI code	Gene name	Allele	Background	Source name	Molecular lesion	References
AT1G13710	KLUH (KLU) / CYP78A5	klu-019348	Col	SALK_019348	T-DNA insertion	This analysis*.
		klu-4	Col	SM_3_39145	dSpm insertion	[1]
AT1G23380	KNAT6	knat6-2	Col	SALK_054482	T-DNA insertion	[2]
AT1G55580	LATERAL SUPPRESSOR (LAS)	las-101	Col	SALK_000896	T-DNA insertion	[3]
AT1G62360	SHOOT MERISTEMLESS ISTM)	stm-1C	Col	-	Q257 > stop	[4,5]
AT3G15170	CUP-SHAPED COTYLEDON1 (CUC1)	cuc1-1	Ler	-	K123 > T	[6,7]
		cuc1-5	Col	SLAT 12_80_11	dSpm insertion	[3]
AT5G02030	BELLRINGER (BLR)	pny-40126	Col	SALK_040126	T-DNA insertion	[8]
AT5G53950	CUP-SHAPED COTYLEDON2 (CUC2)	cuc2-1	Ler	-	Tag1 insertion	[6]
		cuc2-3	Col	-	T-DNA insertion	[3]
* The insertion site flanking the left border was confirmed by PCR, using verification primers desined by the tool provided by the Salk Institute (http://signal.salk.edu/tdnaprimers.2.html). 1. Anastasiou, E.; Kenz, S.; Gerstung, M.; MacLean, D.; Timmer, J.; Fleck, C.; Lenhard, M. Control of plant organ size by KLUH/CYP78A5-dependent intercellular signaling. Dev Cell 2007, 13, 843-856, doi:10.101…

## Sheet: Table S5
Table S5. Gene-Specific Primers for Rescue Constructs.
AGI code	Gene name	Primer name*	Primer sequence	Template
AT1G13710	KLUH/CYP78A5	GwCYP78A5_F	AAGGAGATAGAACCATGTCTCCGGAAGCTTACGT	Col cDNA
		GwCYP78A5_R	AGAAAGCTGGGTTCAAGCGAAACCAACATTCC
AT1G23380	KNAT6	GwKNAT6_F	AAGGAGATAGAACCATGGATGGAATGTACAATTT	RAFL14-89-I21 (pda12509)**
		GwKNAT6_R	AGAAAGCTGGGTTCATTCCTCGGTAAAGAATG
AT1G30950	UFO	GwUFO_F	AAGGAGATAGAACCATGGATTCAACTGTGTTCAT	Col cDNA
		GwUFO_R	AGAAAGCTGGGTCTAACAGACTCCAGGAAATG
AT1G55580	LAS	BamHI-LAS-F	TATCTGGATCCATGCTTACTTCCTTCAAATC	Col cDNA
		EcoRI-LAS-R	TTCTCGAATTCTCATTTCCACGACGAAACGG
AT1G62360	STM	GwSTM_F	AAGGAGATAGAACCATGGAGAGTGGTTCCAACAG	Ler cDNA
		GwSTM_R	AAGAAAGCTGGGTTCAAAGCATGGTGGAGGAGA
AT1G68640	PAN	GwPAN_F	AAGGAGATAGAACCATGCAGAGCAGCTTCAAAAC	RAFL19-57-M21 (pda11315 )**
		GwPAN_R	AGAAAGCTGGGTTTAGTCTCTAGGTCTGGCTA
AT3G23290	LSH4	23290 attB1	AAAAAGCAGGCTTTATGGATCATATCATCGGCTTTATGGG	Ler cDNA
		23290 attB2	AGAAAGCTGGGTAATTAGGGCTACTTGAAATCGCCGG
AT5G02030	BLR	BLRcDNAfull-F	TTTCCCATGGCTGATGCATA	Ler cDNA
		BLRcDNAfull-R	TCAACCTACAAAATCATGTA
AT5G03350	SAI-LLP1	GwLegume_F	AAGGAGATAGAACCATGAAGATTCATAAACTCTG	Ler cDNA
		GwLegume_R	AGAAAGCTGGGTTTAGATTCTCTTGGCACTGTTCT
AT5G11930	GRXC10/ROXY20	GwGluta_F	AAGGAGATAGAACCATGAAGACGATGCGAGGTTT	Col cDNA
		GwGluta_R	AGAAAGCTGGGTTTATGCCCATAAGGCTCCAA
AT5G53950	CUC2	GwCUC2_F	AAGGAGATAGAACCATGGACATTCCGTATTACCA	Ler cDNA
		GwCUC2_R	AGAAAGCTGGGTTCAGTAGTTCCAAATACAGT
*After initial amplification by gene specific primers, each fragment was further amplified using a pair of adaptor primers GwSdKz_F (GGGGACAAGTTTGTACAAAAAAGCAGGCTTCGAAGGAGATAGAACC) and Gw_R (GGGGACCACTTTGTACAAGAAAGCTGGGTT) except for LSH4, for which the Gw_F primer (GGGGACAAGTTTGTACAAAAAAGCAGGCT) was used instead of GwSdKz_F. ** cDNA clones derived from Col (GenBank: BT002930.1 and AK118286.1)

## Sheet: Table S6
Table S6. Primers used for cloning probe templates for in situ hybridization.
AGI code	Gene name	Primer name	Primer sequence	Template
AT1G13710	KLUH / CYP78A5	CYP78A5fw	ATTCCGACATCCCAAAACTG	Ler genomic DNA
		CYP78A5rv	AAGCAAACCGAGGGGATG
AT1G68640	PERIANTHIA (PAN)	PAN_34F	TCACTCCCTCCTTCCCTTTT	Col cDNA
		PAN_525R	AGCTGAAACCGAATCACACC
AT3G53230	CELL DIVISION CYCLE 48B (ATCDC48B)	CDC48_F	CTCCGTCGTTTCTCTTCACC	Col cDNA
		CDC48_R	TTTGTTTCCTGACACCACCA
AT5G02030	BLR	BLR_L	ATGGCTGATGCATACGAGCC	Col cDNA
		BLR_R	TCAACCTACAAAATCATGTA
AT5G03210	DBP-INTERACTING PROTEIN 2 (DIP2)	03210F	TGATAATCGGTGCGATCAGA	Ler genomic DNA
		03210R	GTCCCGGTTCGGTTAGAAAG
AT5G11930	GRXC10/ROXY20	gluta_F	AAGACGATGCGAGGTTTACG	Ler genomic DNA
		gluta_R	CCGACTGGCAAAAGATAAAGA
AT5G03350	SAI-LLP1	legumeF	GTCTTCCTTGGAGACGCTGA	Ler genomic DNA
		legumeR	CTGGAAGGTCCAACTCCAAA
AT4G04610	APR1	APR1_F	AAAAACGAAGAATCAAAACAAATC	Col cDNA
		APR1_R	TCAGGATTCAACCTCCCTGT
AT4G21990	APR3	APR3_F	GCTGCTTCTTTTATAATCCCATTT	Col cDNA
		APR3_R	TCTCCACGGTATCGAAGAGTC

## Sheet: Table S7
Table S7. Primers used for qRT-PCR experimetns.
AGI code (Gene name)	Primer Name	Sequence	Experiments
AT1G08830	AT1G08830-L	CATCATTGGTCTCCAGGGCT	Table S2 and S3
	AT1G08830-R	CGGAATTTTCTCTGTTTTCTGTCTG
AT1G10580	AT1G10580-L	TTACGCAAGAGTATGATCAGC	Table S2 and S3
	AT1G10580-R	AACACTTTGCAGCTCTTCCA
AT1G13710	AT1G13710-L-A	CCAAGCAAGACATCAACGAA	Table S2 and S3, Fig 1E and 1F
(KLU)	AT1G13710-R-A	GTCGGCGGAATAATTGAGAA
AT1G16030	AT1G16030-L	TATGCCGACAGATGGTGA	Table S2 and S3
	AT1G16030-R	TACTCGAAACAACTGAAACAGC
AT1G23380	AT1G23380-L	ATGTACAATTTCCATTCGGC	Fig 1E and 1F
(KNAT6)	AT1G23380-R	CGACGACAAAGCGGAGAC
AT1G24793	AT1G24793-L	GGGTCATGCACTGCACACT	Table S2 and S3
	AT1G24793-R	TATTCACAAGAGTAATGATCTTCCA
AT1G26800	AT1G26800-L	CTGTTTGTAGGTACGAGATGCC	Table S2 and S3
	AT1G26800-R	GTAAATCCTAATTCTCGGACTCAAC
AT1G30950	AT1G30950-L	TCAGCCGCTCTACACACAGT	Table S2 and S3, Fig 1E and 1F
(UFO)	AT1G30950-R	CCGACACACTCGAATCCTTT
AT1G49240	ACT8_LC-f	TCAGCACTTTCCAGCAGATG	Table S2 and S3 (Endogenous control)
(ACT8)	ACT8_LC-r	ATGCCTGGACCTGCTTCAT
AT1G55580	LAS-L	AAAGCAAAGACATCGGAGGTT	Fig 1E and 1F
(LAS)	LAS-R	AACGAAACCAAACCTCTTCATC
AT1G62360	STM-L	CCTAAAGAAGCTCGTCAACAACT	Table S2 and S3
(STM)	STM-R	GGCGAGCTTTTGTTGCTC
AT1G68640	AT1G68640-L	TGCATCCTCTGCTTGTTGAG	Table S2 and S3, Fig 1E and 1F
(PAN)	AT1G68640-R	ATATTGGGGAACCATGTGGA
AT2G01520	AT2G01520-L-A	ACCGGAGGTGTTCAAGGAG	Table S2 and S3
	AT2G01520-R-A	ATCACGTGACCTTCGAGTCC
AT2G11520	AT2G11520-L	TCTGAGAAGATTCCACAAAG	Table S2 and S3
	AT2G11520-R	TGGTGACTGTCTGCAAAA
AT2G20560	AT2G20560-L	GGTTAACCTCAGAGCAGAAGA	Table S2 and S3
	AT2G20560-R	TATTAGGAGGTATCCAATCG
AT2G21060	AT2G21060-L	TAGCGGTGGTGCTCGTTG	Table S2 and S3
	AT2G21060-R	AACCATAACAACCACAAGTCCT
AT2G32120	AT2G32120-L	GGTTCCAGCTCACACGGTTC	Table S2 and S3
	AT2G32120-R	CCATTTCCCAAATCCACTTC
AT2G33210	AT2G33210-L-A	GCCTTTGCAATCAGTTCACC	Table S2 and S3
	AT2G33210-R-A	CGCATGATTAGCACCTCTGA
AT2G36830	AT2G36830-L	CTGTGCCGGCTTTTGGTCT	Table S2 and S3
	AT2G36830-R	GATTGCGATGGGAGCAAT
AT2G46060	AT2G46060-L	CCACGGGCAGTCAAAGAA	Table S2 and S3
	AT2G46060-R	TGTGCCACATCCAGTAGC
AT2G47180	AT2G47180-L	TCCGGTCAGTAAGAGGTTGG	Table S2 and S3
	AT2G47180-R	GTGAAGAAGACCTGTTATTTGGA
AT3G02040	AT3G02040-L-A	GTTATTCGCTTTGCGAGAGG	Table S2 and S3
	AT3G02040-R-A	AGCCATTCATGTCTCGGAAG
AT3G08770	AT3G08770-L	CTCAAACTTCTGTGGACCG	Table S2 and S3
	AT3G08770-R	TGTCGCAGTCAGTGGAAGG
AT3G08900	AT3G08900-L	GAATGCGCGAAGGTGCCATA	Table S2 and S3
	AT3G08900-R	GTCAGAAGGGATGCAAAACAAA
AT3G08970	AT3G08970-L	TATCCCAGAAATCACTCTCTC	Table S2 and S3
	AT3G08970-R	CATTTGATCTGGGGTTTCT
AT3G11820	AT3G11820-L	CCTCCTCAGGCAAGGCGT	Table S2 and S3
	AT3G11820-R	AAACGGGAGATTAACAACAAACCAG
AT3G13470	AT3G13470-L	GTTATGGATACTAAGATAGACCGAC	Table S2 and S3
	AT3G13470-R	TAGTGAACACATTATTCTCTGG
AT3G13860	AT3G13860-L	TTTGCTTTTGACAACAACAGAGGC	Table S2 and S3
	AT3G13860-R	GCAAAGTTCGTAATATACGACCACA
AT3G43160	AT3G43160-L-A-6	CTTACTCGGTTCGGACTTGG	Table S2 and S3
	AT3G43160-R-A-6	TCGATAGTCGGTCGGACAGT
AT3G53230	AT3G53230-L-A	TGGTGTCAGGAAACAAATGG	Table S2 and S3
	AT3G53230-R-A	TCCTTTGGGAGGTTTCACAC
AT3G63350	AT3G63350-L-A	AGGCTGGCTTGATCAAAATG	Table S2 and S3
	AT3G63350-R-A	CCGTCCATATCCTTGCATCT
AT4G04610	AT4G04610-L-A	AAGCCATGGAAGCATCGTAT	Table S2 and S3
	AT4G04610-R-A	TCTGGTCACCATCTGCTCTG
AT4G12400	AT4G12400-L	GATCTAGTGGTGAAGATACTGA	Table S2 and S3
	AT4G12400-R	TTCCCCATCTCAAGATAAAC
AT4G21990	AT4G21990-L	AATCCGCAATAAAATCCGC	Table S2 and S3
	AT4G21990-R	TTTGGGGCTAATGAGTAATG
AT4G25200	AT4G25200-L	CGAAGATGAAAGAACAAGAGAG	Table S2 and S3
	AT4G25200-R	GTCTTTAGAGACTACATGACTCAAC
AT4G27670	AT4G27670-L	AGTGATGATTCTTGGTCTGG	Table S2 and S3
	AT4G27670-R	ACTTGCATCACACACTTTAAGC
AT4G29030	AT4G29030-L	TGGCGAAGTGGTTTTTCACTATCT	Table S2 and S3
	AT4G29030-R	CGCCACCAAAGGGTAAAC
AT4G30250	AT4G30250-L	GTTGTATGGACCACCTGGAA	Table S2 and S3
	AT4G30250-R	AGCCCCGACAGAGTCACC
AT5G02030	AT5G02030-L-A	GTGGGTCGTGGGATTTACAC	Fig 1E and 1F
(BLR)	AT5G02030-R-A	CATCAGAAACACCGCAGAGA
AT5G03210	AT5G03210-L	CCGGAGAAATGATTTGTGGA	Table S2 and S3
	AT5G03210-R	TTGATAATCGGTGCGATCAG
AT5G03340	AT5G03340-L	ATTGGGGTTTTGGATTTTCA	Table S2 and S3
	AT5G03340-R	AGCGAGGGCAATGCATAC
AT5G03350	AT5G03350-L	GGTCCACTCCAGTCCCTTTC	Table S2 and S3, Fig 1E and 1F
(SAI-LLP1)	AT5G03350-R	GAAAGTGAAAGAAGTTTCAAATGGAT
AT5G10695	AT5G10695-L	TTCAAGTGGTTGACGTAAATAGCC	Table S2 and S3
	AT5G10695-R	ATAGAAATGATCTCGTATGAGGTGG
AT5G11930	AT5G11930-L-A-2	GGTGGAGGAGGAGACTGTTG	Table S2 and S3, Fig 1E and 1F
(ROXY20)	AT5G11930-R-A-2	AAGACGATGCGAGGTTTACG
AT5G20150	AT5G20150-L	TCCATTGTTGGAGCAAGA	Table S2 and S3
	AT5G20150-R	TTACATCAACTACAACACACCC
AT5G24660	AT5G24660-L	ATGAACGAGCTCTCTCGTCTTT	Table S2 and S3
	AT5G24660-R	CGCAAAAATCAATCGGTAAC
AT5G25450	AT5G25450-L	GCTGAAGCGGGAGAGAGCTG	Table S2 and S3
	AT5G25450-R	GTAAGGTTCACATATCCATGCATAACC
AT5G44340	TUB4 F	GAGGGAGCCATTGACAACATCTT	Fig 1E and 1F (Endogenous control)
(TUB4)	TUB4 R	GCGAACAGTTCACAGCTATGTTCA
AT5G45020	AT5G45020-L	AATATCGACTACTCTTCGCCTC	Table S2 and S3
	AT5G45020-R	ATAAAAGAGAATGATCTGTGTCA
AT5G47590	AT5G47590-L	CAATCCGGAATACGCTTGGAG	Table S2 and S3
	AT5G47590-R	TGTTGATGGTGGTCATGTCG
AT5G51570	AT5G51570-L	CGTATTGTATCTTAGGAGGTTG	Table S2 and S3
	AT5G51570-R	ATTTGATCCTAGTGGAGAGA
AT5G55410	AT5G55410-L	TTTTTATTCGCGCAGTTTGA	Table S2 and S3
	AT5G55410-R	ATGTTTGCAGCCCCATAGAG
AT5G57290	AT5G57290-L-A	TCGTAGGTGGAAGAAGCTGAA	Table S2 and S3
	AT5G57290-R-A	TCTCATTCGTGTGCAAAAGC
AT5G57350	AT5G57350-L	TAACAAGAAGATGATTAAGGAAG	Table S2 and S3
	AT5G57350-R	TTTTTATTCAAGAGAGGGG
